# Supplementary material
Source: publisher figshare collection journal article supplement (https://aacr.figshare.com/articles/dataset/_/22692340)
Supplement: Supplementary file 1 [file 40287463]

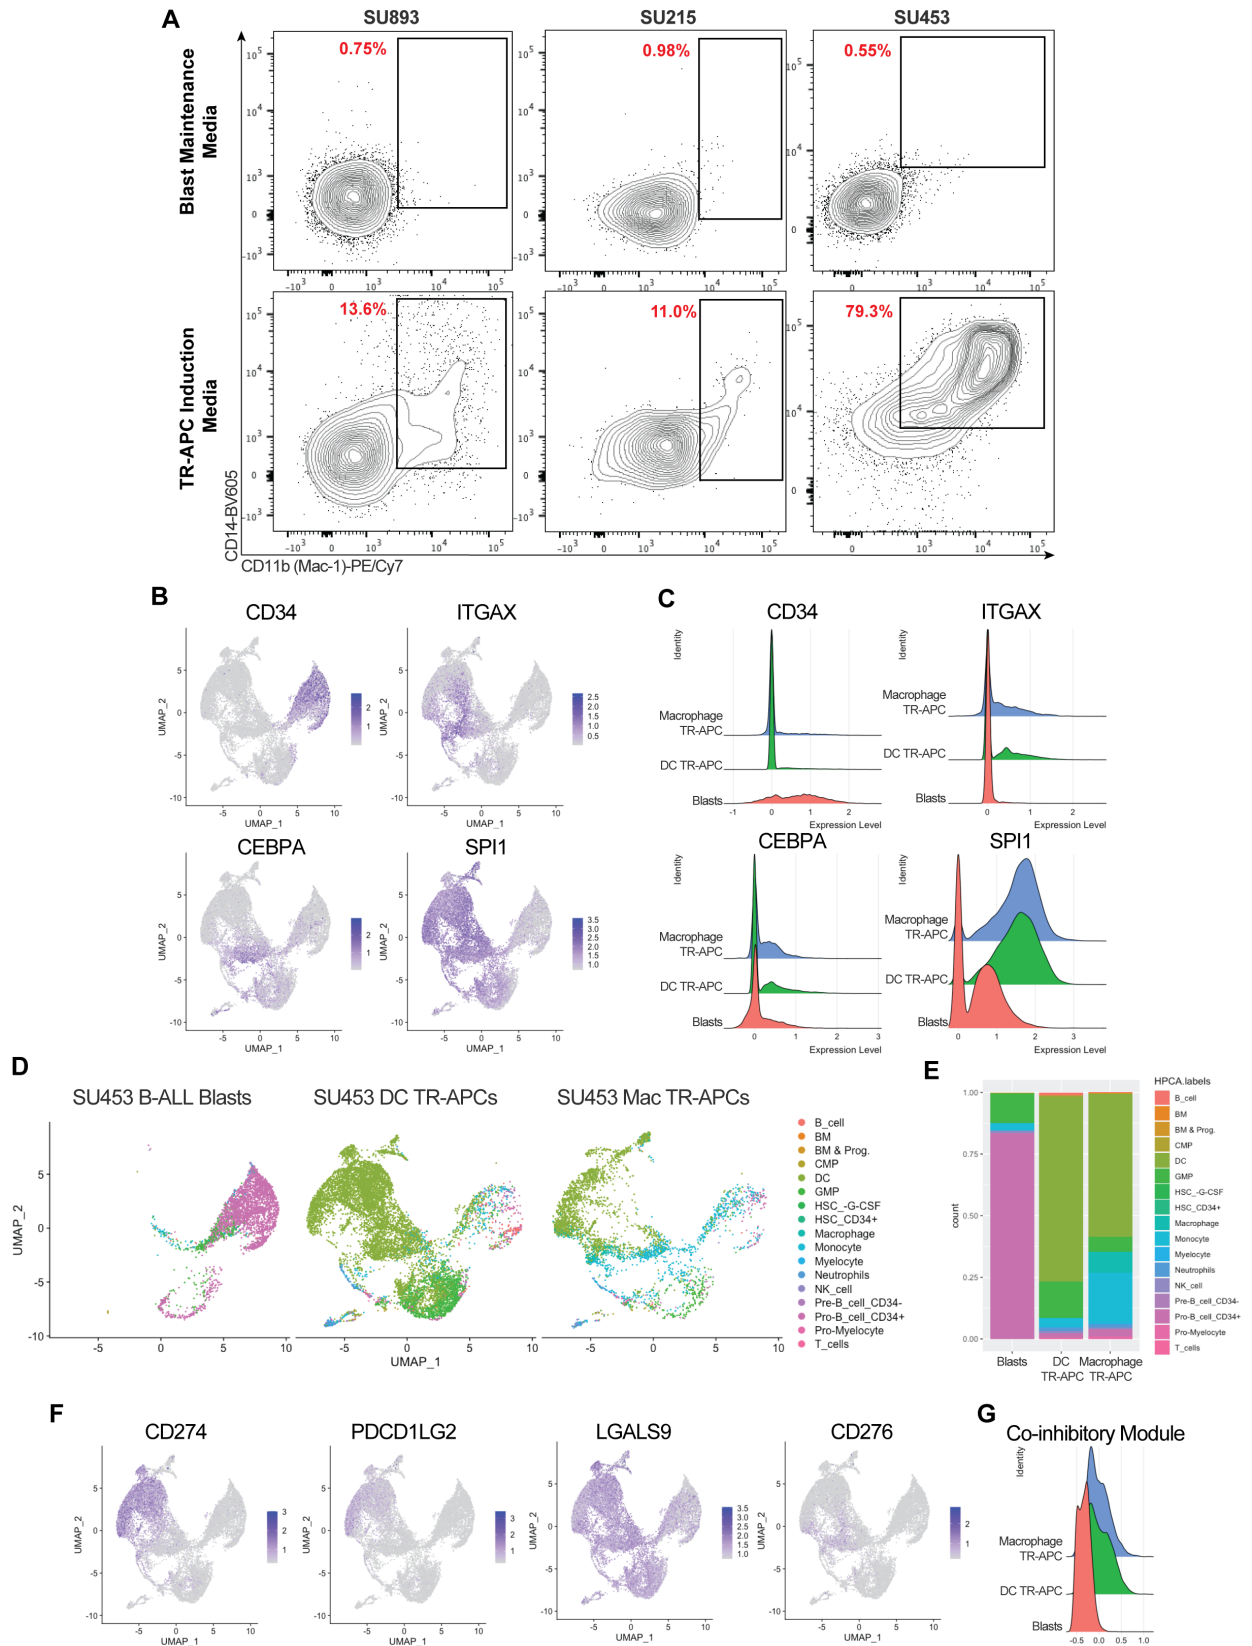

**Supplemental Figure S9: Primary B-ALL TR-APCs can be generated via exogenous**

**cytokine stimulation.** **A**, Representative flow cytometric analysis of surface CD11b and CD14 expression on 3 primary B-ALL specimens following 14 day culture in blast maintenance (FLT3L and IL-7) or TR-APC induction (GM-CSF, M-CSF, IL-3, FLT3L, and IL-7) media. TR-APC gate is shown as a frequency of single, live cells. **B-C**, Expression of representative myeloid (*CEBPA*, *SPI1*, *ITGAX*) and B-ALL blast (*CD34*) genes among B-ALL blasts and TR-APCs. **D**, UMAP projections of primary B-ALL TR-APCs and unmanipulated B-ALL blasts classified according Human Primary Cell Atlas (HPCA) immune cell expression data. **E**, Summary of cell classification frequency in each sample according to HPCA annotation. **F**, Expression of representative co-inhibitory molecules among B-ALL blasts and B-ALL TR-APCs. **G**, Gene module scores of co-inhibitory gene expression among B-ALL blasts and B-ALL TR-APCs.
